# Supplementary material
Source: PubMed Central journal article supplement (PMC7274971)
Supplement: mmc2.pdf [file mmc2.pdf]

**Default Question Block**

I am a:

- Program director
- Associate program director
- Resident

Select year of training:

- PGY 1
- PGY 2
- PGY 3
- PGY 4
- PGY 5
- PGY 6
- Other

Gender:

- Male
- Female
- Prefer not to answer
- Prefer to self-describe

Program location:

City

State

Case volume in each subspecialty has:

|                                                  | Decreased             | No Change             | Increased             |
|--------------------------------------------------|-----------------------|-----------------------|-----------------------|
| Urologic Oncology                                | <input type="radio"/> | <input type="radio"/> | <input type="radio"/> |
| Endourology/Stone Disease                        | <input type="radio"/> | <input type="radio"/> | <input type="radio"/> |
| General Urology (i.e. BPH tx, scrotal pathology) | <input type="radio"/> | <input type="radio"/> | <input type="radio"/> |
| Pelvic and Reconstructive Surgery                | <input type="radio"/> | <input type="radio"/> | <input type="radio"/> |
| Andrology/Infertility                            | <input type="radio"/> | <input type="radio"/> | <input type="radio"/> |
| Pediatrics                                       | <input type="radio"/> | <input type="radio"/> | <input type="radio"/> |
| Urologic Emergencies                             | <input type="radio"/> | <input type="radio"/> | <input type="radio"/> |

Residents at our institution continue to assist in urology cases.

- No
- Yes

Our institution has implemented tele-health (video or telephone) visits for urology clinic patients.

- No
- Yes

Residents are participating in tele-health (video or telephone visits).

- No
- Yes

Residents continue to see in-person clinic patients.

- No
- Yes

The number of residents per team managing urology inpatients and consults has been modified in the following ways:

- Decreased
- No change
- Increased

In my opinion, at present:

|                                                                                 | Should be postponed regardless of COVID-19 status | Should be performed in COVID-19 negative patients | Should be performed regardless of pre-op testing or COVID-19 status |
|---------------------------------------------------------------------------------|---------------------------------------------------|---------------------------------------------------|---------------------------------------------------------------------|
| Prostatectomy for favorable intermediate risk prostate cancer                   | <input type="radio"/>                             | <input type="radio"/>                             | <input type="radio"/>                                               |
| Transurethral resection of the prostate in catheter-dependent patients          | <input type="radio"/>                             | <input type="radio"/>                             | <input type="radio"/>                                               |
| Surgical procedures for incontinence                                            | <input type="radio"/>                             | <input type="radio"/>                             | <input type="radio"/>                                               |
| Surgical procedures for obstructing unilateral ureteral stone in absence of UTI | <input type="radio"/>                             | <input type="radio"/>                             | <input type="radio"/>                                               |

Educational conferences (grand rounds, didactics, journal club, indications conferences, etc) have been:

- Continued in person
- Transitioned to virtual didactics / conferences
- Cancelled or postponed

Number of weekly educational activities (didactics, journal club, indications conferences, etc) have:

- Decreased
- No change
- Increased

Residents are providing direct patient care to COVID-19 positive patients and COVID-19 'rule-out' patients (urology patients or otherwise)

- No
- Yes

Urology residents have been re-deployed to provide non-urology care.

- No
- Yes

Urology residents have been re-deployed to provide non-urology care in the following settings:

- Emergency Room
- Med/surg ward
- Intensive care
- 'line teams' (invasive procedure teams i.e. central line, a-line etc)
- Non-urology in person clinics
- Non-urology telehealth
- Other

Redeployed urology residents have received compensation in the form of:

- Additional pay

- Earned additional vacation time
- Rent support
- None of the above
- Other

In preparation for re-deployment for non-urology service, residents were provided:

- In person didactics
- In person procedural instruction
- Virtual / Self-directed didactic
- None
- Other

At least one resident has been required to stay at home from work for some period of time due to COVID-19 related personal illness, exposure or ill family member:

- No
- Yes

Pregnant residents are:

- Working without modification.
- Not involved in COVID-19 patient care (positive or 'rule out')
- Not involved in direct patient care (i.e. work from home, tele-health, alternative tasks)
- Not applicable

Immunocompromised or otherwise medically vulnerable residents are:

- Working without modification.
- Not involved in COVID-19 patient care (positive or 'rule out')
- Not involved in direct patient care (i.e. work from home, tele-health, alternative tasks)
- Not applicable

Members of my household include:

- Partner / spouse
- Roommate (non-family)
- Parent or in-law >65 yo
- One or more children
- Childcare provider
- None
- Other

The following services have been provided at a program or institutional level and are accessible to urology residents:

- Childcare services
- Overnight accommodations
- Additional meals
- Other

Due to COVID-19 economic impacts my spouse, significant other, partner or roommate has:

- Lost his/her job
- Income decreased
- No change
- Not applicable
- Other

My intended immediate post-residency practice setting is:

- Fellowship
- Academic medical center
- Non-academic medical center
- Large urology group practice
- Single urology group practice
- Solo practice
- Not applicable
- Other

My intended immediate post-residency practice plan has changed due to COVID-19:

- No
- Yes - increased interest in fellowship
- Yes - my job offer was changed
- Yes - due to hiring freeze or offer rescinded by intended employer
- Not applicable
- Other

Changes in urology services due to COVID-19 have:

|                                                               | Strongly Disagree     | Disagree              | Neither agree nor disagree | Agree                 | Strongly agree        |
|---------------------------------------------------------------|-----------------------|-----------------------|----------------------------|-----------------------|-----------------------|
| Negatively impacted surgical training.                        | <input type="radio"/> | <input type="radio"/> | <input type="radio"/>      | <input type="radio"/> | <input type="radio"/> |
| Allowed more time for self-directed learning.                 | <input type="radio"/> | <input type="radio"/> | <input type="radio"/>      | <input type="radio"/> | <input type="radio"/> |
| Allowed more time for research.                               | <input type="radio"/> | <input type="radio"/> | <input type="radio"/>      | <input type="radio"/> | <input type="radio"/> |
| Improved morale and / or sense of mission.                    | <input type="radio"/> | <input type="radio"/> | <input type="radio"/>      | <input type="radio"/> | <input type="radio"/> |
| Increased anxiety about competency upon residency completion. | <input type="radio"/> | <input type="radio"/> | <input type="radio"/>      | <input type="radio"/> | <input type="radio"/> |
| Disrupted home life.                                          | <input type="radio"/> | <input type="radio"/> | <input type="radio"/>      | <input type="radio"/> | <input type="radio"/> |
| Made me feel more pride in my work overall.                   | <input type="radio"/> | <input type="radio"/> | <input type="radio"/>      | <input type="radio"/> | <input type="radio"/> |
| Increased likelihood of post-residency fellowship training.   | <input type="radio"/> | <input type="radio"/> | <input type="radio"/>      | <input type="radio"/> | <input type="radio"/> |
| Increased my worries about my / my family's finances.         | <input type="radio"/> | <input type="radio"/> | <input type="radio"/>      | <input type="radio"/> | <input type="radio"/> |

Powered by Qualtrics
